# Supplementary material
Source: MDPI journal article supplement (https://www.mdpi.com/2077-1312/9/6/679)
Supplement: s1 [file s1]

# Numerical modelling of air pollutants and greenhouse gases emissions in intermodal transport chains

Mónica M. Ramalho and Tiago A. Santos

## Supplementary Materials

**Table S1.** Vehicle characteristics and corresponding variables.

|                      |                                                                                                                                                                                                                                                                           |  |
|----------------------|---------------------------------------------------------------------------------------------------------------------------------------------------------------------------------------------------------------------------------------------------------------------------|--|
| <b>WFEU</b>          | Average weight of one cargo unit in tonnes.                                                                                                                                                                                                                               |  |
| <b>Truck</b>         |                                                                                                                                                                                                                                                                           |  |
| <b>Variable</b>      | <b>Description</b>                                                                                                                                                                                                                                                        |  |
| <b>TruClass</b>      | Truck weight class: gross weight of truck in tonnes.                                                                                                                                                                                                                      |  |
| <b>TruFuel</b>       | ‘DIE’ for diesel trucks.<br>‘LNG’ for liquefied natural gas trucks.                                                                                                                                                                                                       |  |
| <b>TruEuro</b>       | Truck’s EURO Class 0-6.                                                                                                                                                                                                                                                   |  |
| <b>TruSFOC</b>       | Truck’s engine specific fuel consumption in g/kWh.                                                                                                                                                                                                                        |  |
| <b>TruPME</b>        | Truck’s engine power in kW.                                                                                                                                                                                                                                               |  |
| <b>Train</b>         |                                                                                                                                                                                                                                                                           |  |
| <b>Variable</b>      | <b>Description</b>                                                                                                                                                                                                                                                        |  |
| <b>TraGreen</b>      | ‘Y’ for trains equipped with DPF+ EGR/SCR.<br>‘N’ for trains not equipped with DPF+EGR/SCR.                                                                                                                                                                               |  |
| <b>TraCap</b>        | Train’s capacity in number of trailers/FEUs.                                                                                                                                                                                                                              |  |
| <b>TraFuel</b>       | ‘DIE’ for diesel trains.<br>‘ELE’ for electric trains.                                                                                                                                                                                                                    |  |
| <b>TraUt</b>         | Train’s capacity utilization factor.                                                                                                                                                                                                                                      |  |
| <b>TraFC</b>         | Train’s engine fuel consumption in kg fuel/h.                                                                                                                                                                                                                             |  |
| <b>Inland Vessel</b> |                                                                                                                                                                                                                                                                           |  |
| <b>Variable</b>      | <b>Description</b>                                                                                                                                                                                                                                                        |  |
| <b>IwwStage</b>      | Vessel’s CCNR <sup>1</sup> (I or II) or Stage (V) emission class.                                                                                                                                                                                                         |  |
| <b>IwwFuel</b>       | ‘EN590’ – Gas oil (EN590 compliant fuel)<br>‘LNG’ – Liquefied Natural Gas<br>‘MeOH’ - Methanol                                                                                                                                                                            |  |
| <b>IwwEAT</b>        | Vessel’s emissions abatement technologies.<br>‘DPF’ - Diesel Particulate Filter<br>‘SCR’ - Selective Catalytic Reduction<br>‘EGR’ - Exhaust Gas Recirculation<br>‘HAM’ - Humid Air Motor<br>‘DPF+SCR’<br>‘DPF+HAM’<br>‘NULL’ – No emission abatement technology installed |  |
| <b>IwwRating</b>     | Vessel’s main diesel engine speed rating.<br>‘MS’ – Medium Speed      ‘SS’ – Slow Speed<br>‘HS’- High Speed                                                                                                                                                               |  |
| <b>IwwCap</b>        | Vessel’s freight capacity in number of trailers/FEUs.                                                                                                                                                                                                                     |  |
| <b>IwwUt</b>         | Vessel’s freight capacity utilization factor.                                                                                                                                                                                                                             |  |
| <b>IwwPME</b>        | Vessel’s main engine power in kW.                                                                                                                                                                                                                                         |  |

|                                                                        |                                                                                                             |                                                                                                                                                                                                                                                                |
|------------------------------------------------------------------------|-------------------------------------------------------------------------------------------------------------|----------------------------------------------------------------------------------------------------------------------------------------------------------------------------------------------------------------------------------------------------------------|
| <b>IwwSpeed</b>                                                        | Vessel’s speed at 100%MCR in clean hull and calm water, in knots.                                           |                                                                                                                                                                                                                                                                |
| <b>Short Sea Vessel</b>                                                |                                                                                                             |                                                                                                                                                                                                                                                                |
| <b>Variable</b>                                                        | <b>Description</b>                                                                                          |                                                                                                                                                                                                                                                                |
| <b>SssTyp</b>                                                          | ‘G’ – General Cargo      ‘C’ – Container<br>‘R’ – Ro-Ro      ‘P’ – Ro-Pax                                   |                                                                                                                                                                                                                                                                |
| <b>SssLpp</b>                                                          | Vessel’s length between perpendiculars in m.                                                                |                                                                                                                                                                                                                                                                |
| <b>SssB</b>                                                            | Vessel’s breadth in m.                                                                                      |                                                                                                                                                                                                                                                                |
| <b>SssD</b>                                                            | Vessel’s design draft (maximum) in m.                                                                       |                                                                                                                                                                                                                                                                |
| <b>SssDead</b>                                                         | Vessel’s deadweight in tonnes.                                                                              |                                                                                                                                                                                                                                                                |
| <b>SssCap</b>                                                          | Vessel’s freight capacity in number of trailers/FEUs.                                                       |                                                                                                                                                                                                                                                                |
| <b>SssUt</b>                                                           | Vessel’s freight capacity utilization factor.                                                               |                                                                                                                                                                                                                                                                |
| <b>SssTier</b>                                                         | IMO NO <sub>x</sub> emission standard 1-3.                                                                  |                                                                                                                                                                                                                                                                |
| <b>SssRating</b>                                                       | Vessel’s main diesel engine speed rating.<br>‘MS’ – Medium Speed      ‘SS’ – Slow Speed<br>‘HS’- High Speed |                                                                                                                                                                                                                                                                |
| <b>SssPME</b>                                                          | Vessel’s main engine propulsive power in kW.                                                                |                                                                                                                                                                                                                                                                |
| <b>SssPAE</b>                                                          | Vessel’s auxiliary engine power in kW.                                                                      |                                                                                                                                                                                                                                                                |
| <b>SssSpeed</b>                                                        | Vessel’s speed at 100%MCR with clean hull and calm water, in knots.                                         |                                                                                                                                                                                                                                                                |
| <b>TPort</b>                                                           | Number of hours at each terminal.                                                                           |                                                                                                                                                                                                                                                                |
| <b>MEoutECA</b><br><b>AEoutECA</b><br><b>MEinECA</b><br><b>AEinECA</b> | <b>Fuel</b>                                                                                                 | ‘HFO’ – Heavy fuel oil (2.6%S)<br>‘LSHFO’ – Low Sulphur Heavy Fuel Oil (1%S)<br>‘VLSFO’ – Very Low Sulphur Fuel Oil (0.5%S)<br>‘ULSFO’ – Ultra Low Sulphur Fuel Oil (0.1%S)<br>‘MDO’ – Marine Diesel Oil<br>‘LNG’ – Liquefied Natural Gas<br>‘MeOH’ - Methanol |
|                                                                        | <b>DPF</b>                                                                                                  | ‘Y’ – Diesel particulate filter is installed for the exhaust.<br>‘N’ – No DPF is installed for the exhaust.                                                                                                                                                    |
|                                                                        | <b>WS</b>                                                                                                   | ‘Y’ – Water scrubbing (fresh/sea water) is installed.<br>‘N’ – No WS is installed.                                                                                                                                                                             |
|                                                                        | <b>SCR</b>                                                                                                  | ‘Y’ – Selective Catalytic Reduction is installed.<br>‘N’ – No SCR is installed.                                                                                                                                                                                |
|                                                                        | <b>EGR</b>                                                                                                  | ‘Y’ – Exhaust Gas Recirculation is installed.<br>‘N’ – No EGR is installed.                                                                                                                                                                                    |

<sup>1</sup> Central Commission for the Navigation on the Rhine

**Table S2.** Emission factors chosen by the software SA in both emission scenarios.

|                   | <b>Scenario 1</b>                                                                                                                                                                                                                                              | <b>Scenario 2</b>                                                                                                                                   |
|-------------------|----------------------------------------------------------------------------------------------------------------------------------------------------------------------------------------------------------------------------------------------------------------|-----------------------------------------------------------------------------------------------------------------------------------------------------|
| <b>Road links</b> | EURO IV – 3.5 g/kWh NOx, 0.02 g/kWh PM<br>Sulphur limit 10 ppm =<br>0.000019551 g SO2/g fuel<br>3.1805 g CO2/g fuel                                                                                                                                            | EURO VI LNG – 0.4 g/kWh NOx,<br>0.01 g/kWh PM<br>Sulphur content 3.5 ppm<br>3.10 g CO2/g fuel                                                       |
| <b>Rail Links</b> | 3151.5 kg CO2/tonne fuel<br>0.019551 kg SO2/tonne fuel<br>1.2 kg PM/ tonne fuel<br>63 kg NOx/tonne fuel                                                                                                                                                        | 3151.5 kg CO2/tonne fuel<br>0.019551 kg SO2/tonne fuel<br>1.2 kg PM/ tonne fuel<br>63 kg NOx/tonne fuel                                             |
| <b>IWW Links</b>  | sfcB = 175 g/kWh<br>sfcAE = 185 g/kWh<br>3.1805 g CO2/g fuel<br>Sulphur limit 10 ppm =<br>0.000019551 g SO2/g fuel<br>8.3 g/kWh NOx for ME<br>11.2 G/kWh NOx for AE<br>0.16 g/kWh PM for ME<br>0.18 g/kWh PM for AE                                            | sfcB = 156 g/kWh<br>sfcAE = 156 g/kWh<br>3.116 g CO2/g fuel<br>0.0000317 g SO2/g fuel<br>1.3 g/kWh NOx for ME and AE<br>0.02 g/kWh PM for ME and AE |
| <b>SSS Links</b>  | sfcB = 185 g/kWh<br>sfcAE = 185 g/kWh<br>3.163 g CO2/g fuel for ME<br>3.255 g CO2/g fuel for AE<br>0.00978 g SO2/g fuel for ME<br>0.0014 g SO2/g fuel for AE<br>10.5 g/kWh NOx for ME<br>11.2 g/kWh NOx for AE<br>0.78 g/kWh PM for ME<br>0.18 g/kWh PM for AE | sfcB = 156 g/kWh<br>sfcAE = 156 g/kWh<br>3.116 g CO2/g fuel<br>0.0000317 g SO2/g fuel<br>1.3 g/kWh NOx for ME and AE<br>0.02 g/kWh PM for ME and AE |
